# Supplementary material for: Analysis of the products of the anionic oligomerisation of a phosphaalkene using MALDI-TOF mass spectrometryElectronic supplementary information (ESI) available: experimental procedures and an additional figure. See http://www.rsc.org/suppdata/cc/b4/b406160h/
Source: Royal Society of Chemistry journal article supplement (doi:10.1039/b406160h), 2004-01-01

## Supporting Information

**Title:** “Analysis of the products of the anionic oligomerisation of a phosphalkene using MALDI-TOF mass spectrometry”

**Authors:** Bronwyn H. Gillon, Derek P. Gates\*

**Affiliation:** *Department of Chemistry, University of British Columbia, 2036 Main Mall, Vancouver, British Columbia, Canada, V6T 1Z1. Email: dgates@chem.ubc.ca*

### General Procedure for MALDI-TOF MS

The MALDI spectra were acquired using a Bruker Biflex IV spectrometer. The samples were dissolved in dichloromethane ( $\text{CH}_2\text{Cl}_2$ ) and deposited on the sample target with a layer of matrix previously deposited. The matrix, 2,5-dihydroxybenzoic acid, was dissolved in THF. The measurements were performed using the following conditions: positive polarity, reflection flight path, 18kV acceleration voltage, 20 shots per sample. Insulin Chain B, bovine insulin (oxidized) and Angiotensin II, human synthetic were obtained from Sigma-Aldrich and used as standards.

**Anionic oligomerisation of 1.** To a stirred solution at  $-78\text{ }^\circ\text{C}$  of mesityl(diphenylmethylene)phosphine **1** (0.050 g, 0.16 mmol) dissolved in diethyl ether (20 mL) was added slowly 1.5M methyllithium in diethylether (0.13 mL, 0.19 mmol). After warming to room temperature, an aliquot was removed and analysed by  $^{31}\text{P}$  NMR ( $\text{Mes}(\text{Me})\text{P}-\text{CPh}_2\text{Li}$ ,  $\delta = -45$  ppm). After warming to room temperature, a solution of **1** (0.150 g, 0.47 mmol) dissolved in diethyl ether (20 mL) was added slowly to the reaction mixture. After stirring for 24 hours, the reaction was quenched with degassed water. The

**Figure A1.** MALDI-TOF mass spectrum of BuLi initiated oligomers.

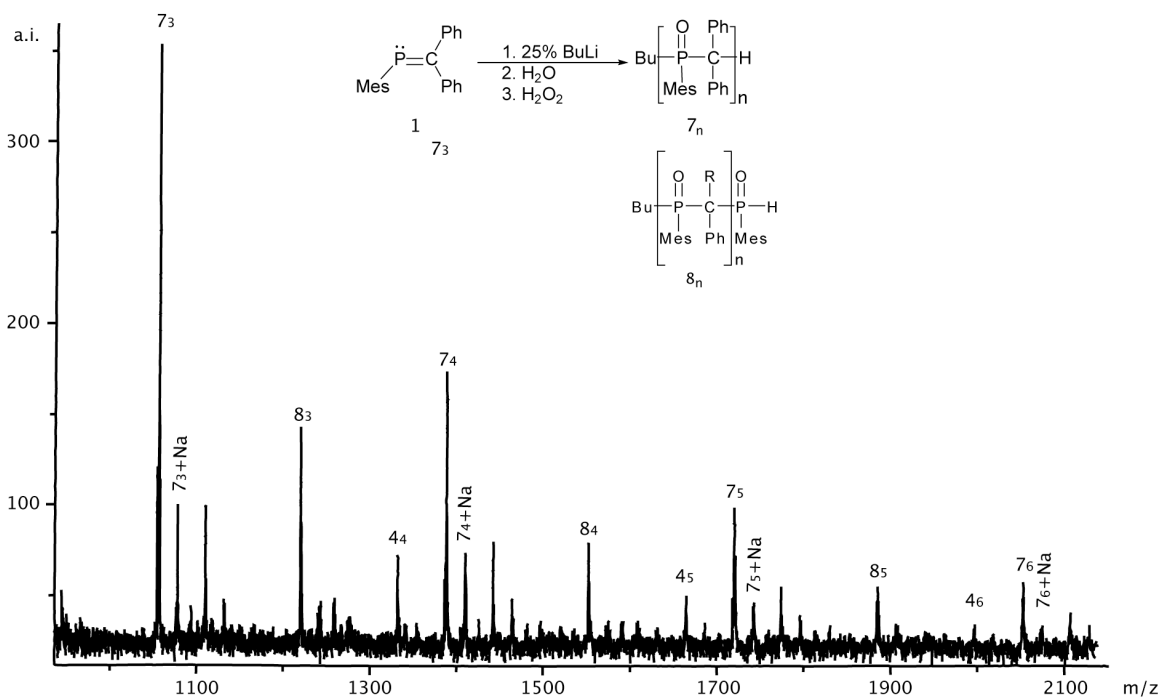

Supplement: b406160h.pdf [file b406160h.pdf]
